# Supplementary material for: Eosinophilic pneumonia induced by lettuce: A case report
Source: Research Square preprint supplement (doi:10.21203/rs.3.rs-1029130/v3), 2022-04-13
Supplement: Supplementary file 1 [file 6e468130c0fb96b235b7ae7d.xlsx]

## Sheet: Table1
Table 1. Laboratory data on admission
Peripheral Blood				Immunoserology
WBC	7.33×103	4.2-10.0×103	/μL	ANA	40	<80
Neutrophil	5.17×103		/μL	PR3-ANCA	＜1.0	＜1.0
	70.5	40-74	%	MPO-ANCA	＜1.0	＜1.0
Lymphocyte	0.95×103		/μL
	13	19-48	%
Eosinophil	0.72×103		/μL
	9.8	0-7	%
Monocyte	0.32×103		/μL
	4.4	3.4-9	%
Basophil	0.12×103		/μL	Blood gas(4L O2)
	1.7	0-1.5	%
Hemoglobin	14.4	12-15	g/dL	pH	7.431	7.35-7.45
Ht	40.9	35-48	%	PaCO2	36.9	32-45	Torr
Plt	26.5	14.8-35.8	/μL	PaO2	65.4	83-108	Torr
				HCO3-	24.2	21-28	mmol/L
Blood Chemistry
Total Bil	0.46	0.1-0.8	g/dL
AST	23	10-34	IU/L	BALF
ALT	16	6-37	IU/L	Total Cell count	19.7×102		/μl
LDH	275	106-211	IU/L	Cell differentials
BUN	13.4	8.5-20	mg/dL	Macrophage	84		％
Cr	0.51	0.43-0.72	mg/dL	Lymphocyte	1		％
Na	135	135-147	mmol/L	Eosinophil	8.5		％
K	3.9	3.6-5.0	mmol/L
Cl	100	96-107	mmol/L
CK	68	29-135	IU/L	BALF Culture
Glu	113	70-110	mg/dL	Negative
CRP	3.55	0-0.6	mg/dL
KL-6	226	<500	IU/mL
